# Supplementary material for: Contributions of Mouse and Human Hematopoietic Cells to Remodeling of the Adult Auditory Nerve After Neuron Loss
Source: PubMed Central journal article supplement — Mol Ther. 2016 Oct 4;24(11):2000–11. doi: 10.1038/mt.2016.174 (PMC5154482; doi:10.1038/mt.2016.174), 2016-10-04
Supplement: mt2016174x4.pdf [file mt2016174x4.pdf]

Table S2. Antibodies were used in the study.

| Antibody              | Immunogen                                                                                                                                | Species    | Catalog No | Supplier               | Dilution |
|-----------------------|------------------------------------------------------------------------------------------------------------------------------------------|------------|------------|------------------------|----------|
| AHA                   | Antibody is raised against human-specific nuclei                                                                                         | Mouse      | MAB1281    | Millipore              | 1:200    |
| AHMA                  | Antibody recognizes a 60kDa nonglycosylated protein component of mitochondria found in human cells                                       | Mouse      | MAB1273    | Chemicon               | 1:200    |
| F4/80                 | Antibody recognizes the mouse F4/80 antigen, a 160kD glycoprotein expressed by most murine macrophages                                   | Rat        | MCA497     | Serotec                | 1:200    |
| Iba1                  | Antibody is raised against synthetic peptide corresponding to C-terminus of Iba1                                                         | Rabbit     | 019-19741  | Wako                   | 1:400    |
| Sox2                  | Antibody is raised against a peptide mapping near the C-terminus of human Sox2                                                           | Goat       | Sc-17320   | Santa Cruz             | 1:100    |
| Sox10                 | Antibody is raised against a peptide mapping at the N-terminus of human Sox-10                                                           | Goat       | Sc-17342   | Santa Cruz             | 1:300    |
| Sox10                 | Polyclonal antibody raised against a purified bacterially expressed protein consisting of amino acids 181-233 and 308-400 of rat Sox10   | Guinea pig |            | A gift from Dr. Wegner | 1:500    |
| TuJ1                  | Antibody raised against the microtubules from rat brain                                                                                  | Rabbit     | MRB-435P   | Covance                | 1:300    |
| $\beta$ - Tubulin III | Synthetic peptide corresponding to the carboxyl-terminal sequence of human $\beta$ -tubulin isotype III conjugated to BSA                | Mouse      | T8660      | Sigma                  | 1:300    |
| CD31                  | Antibody gives a positive reaction against recombinant rat PECAM-1                                                                       | Mouse      | MAB1393    | Millipore              | 1:200    |
| CD45R                 | Antibody is raised to an extracellular domain of CD45 that is dependent upon the expression of exon A and specific carbohydrate residues | Rat        | Sc-19597   | Santa Cruz             | 1:200    |
